# Supplementary material
Source: Elsevier journal article supplement (https://www.sciencedirect.com/science/article/pii/S0210569121002692)
Supplement: mmc1 [file S0210569121002692:mmc1.doc]

Table 1 – Demographic and baseline characteristics of the patients (n=80)

| Variables | Mean ± SD/ Number(%) |
| --- | --- |
| Age (yrs) | 52 ± 13 |
| Males | 52 (65) |
| Comorbidities present | 60/80 (75) |
| Diabetes mellitus | 32/80 (40) |
| Hypertension | 31/80 (38.7) |
| CAD | 4/80 (5) |
| CKD | 4/80 (5) |
| Other comorbidities | 25 (31.2) |
| Baseline parameters | Mean ± SD |
| Heart rate( beats/min) | 96 ± 21 |
| SBP (mm/Hg) | 127 ± 20 |
| DBP (mm/Hg) | 73 ± 11 |
| Respiratory rate ( breaths/min) | 28.67 ± 4.8 |
| Initial respiratory support of patients | Number (%)/Mean ± SD |
| Face mask | 30/80 (37.5) |
| Non-rebreathing mask | 23/80 (28.75) |
| HFNC/ NIV | 07/80 (8.75) |
| Invasive ventilation | 20/80 (25) |
| Initial S/F ratio | 159.77±72.14 |
| Initial P/F ratio | 147.86±103.26 |

CAD-coronary artery disease; CKD- chronic kidney disease; SBP-systolic blood pressure; DBP- Diastolic blood pressure; S/F ratio - SpO2/FiO2;P/F ratio- PaO2/FiO2 ; HFNC – high flow nasal cannula; NIV – non invasive ventilation
